# Supplementary material
Source: publisher figshare collection journal article supplement (https://gsajournals.figshare.com/articles/dataset/_/7346714)
Supplement: Supplementary file [file 1]

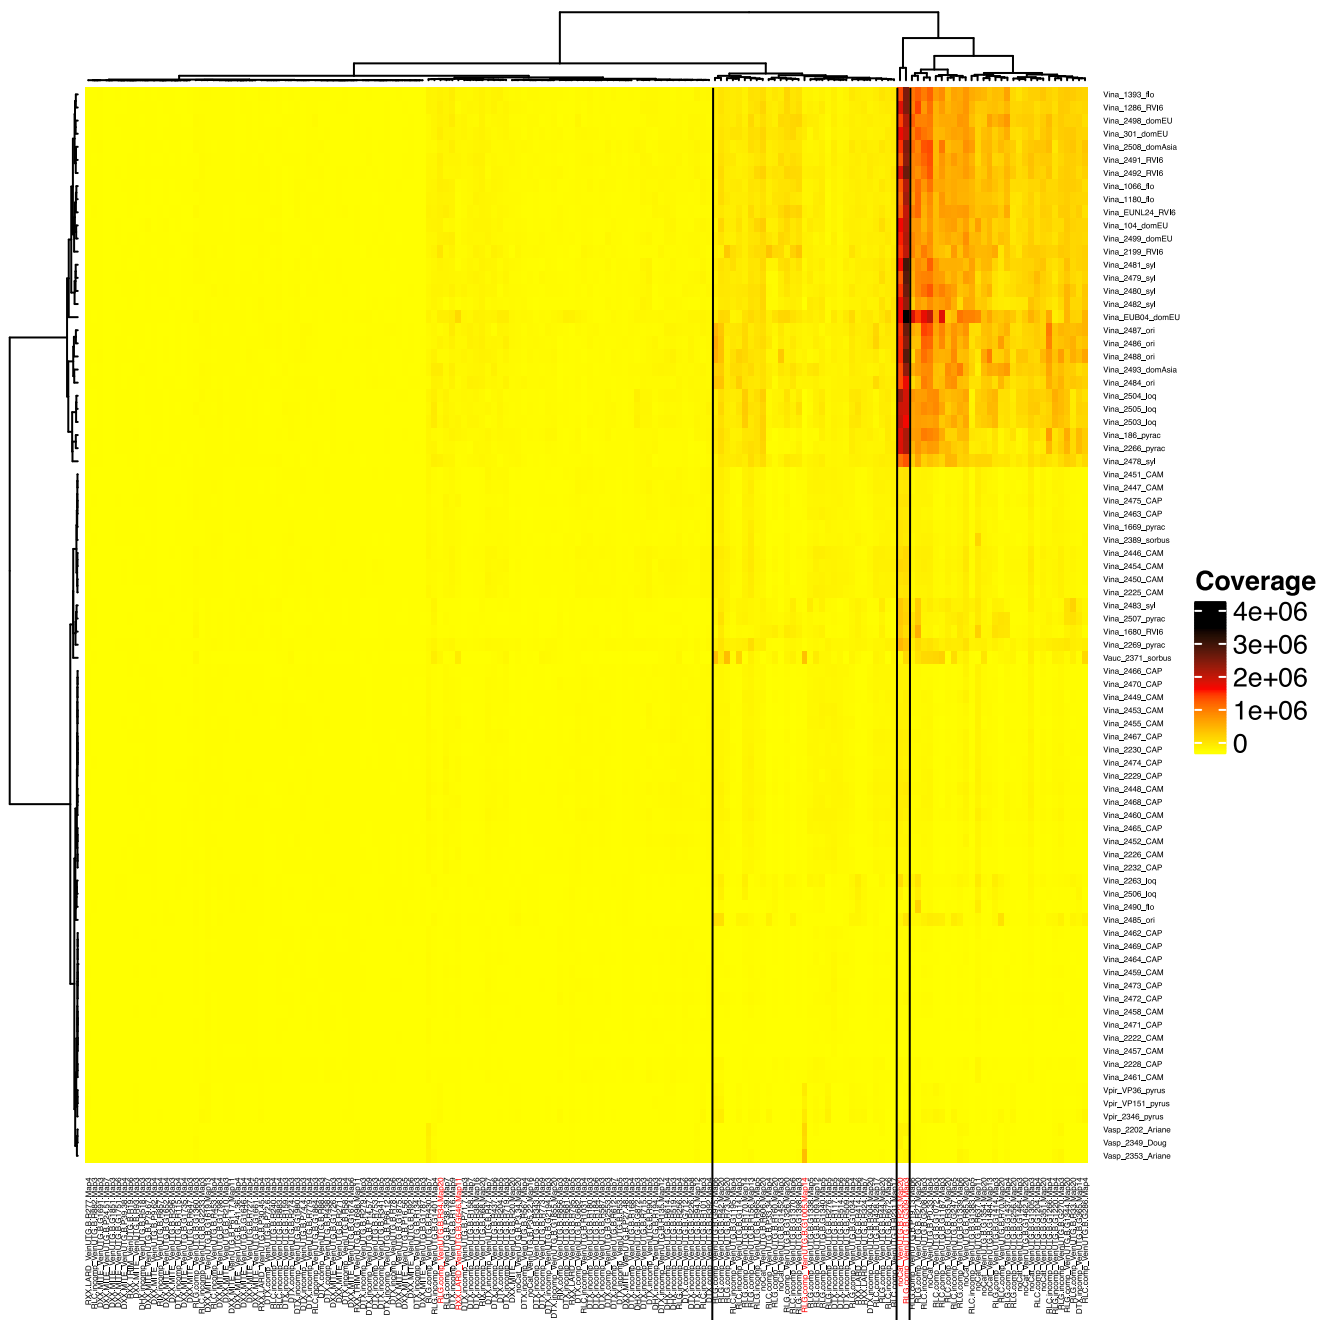

**Figure S2.** Hierarchical clustering of TE models annotated by REPET in all *Venturia* isolates. The Ward method with euclidian distance was employed. The color scale indicate the genome coverage (bp).
