# Supplementary material
Source: publisher figshare collection journal article supplement (https://gsajournals.figshare.com/articles/dataset/_/7346714)
Supplement: Supplementary file [file 1]

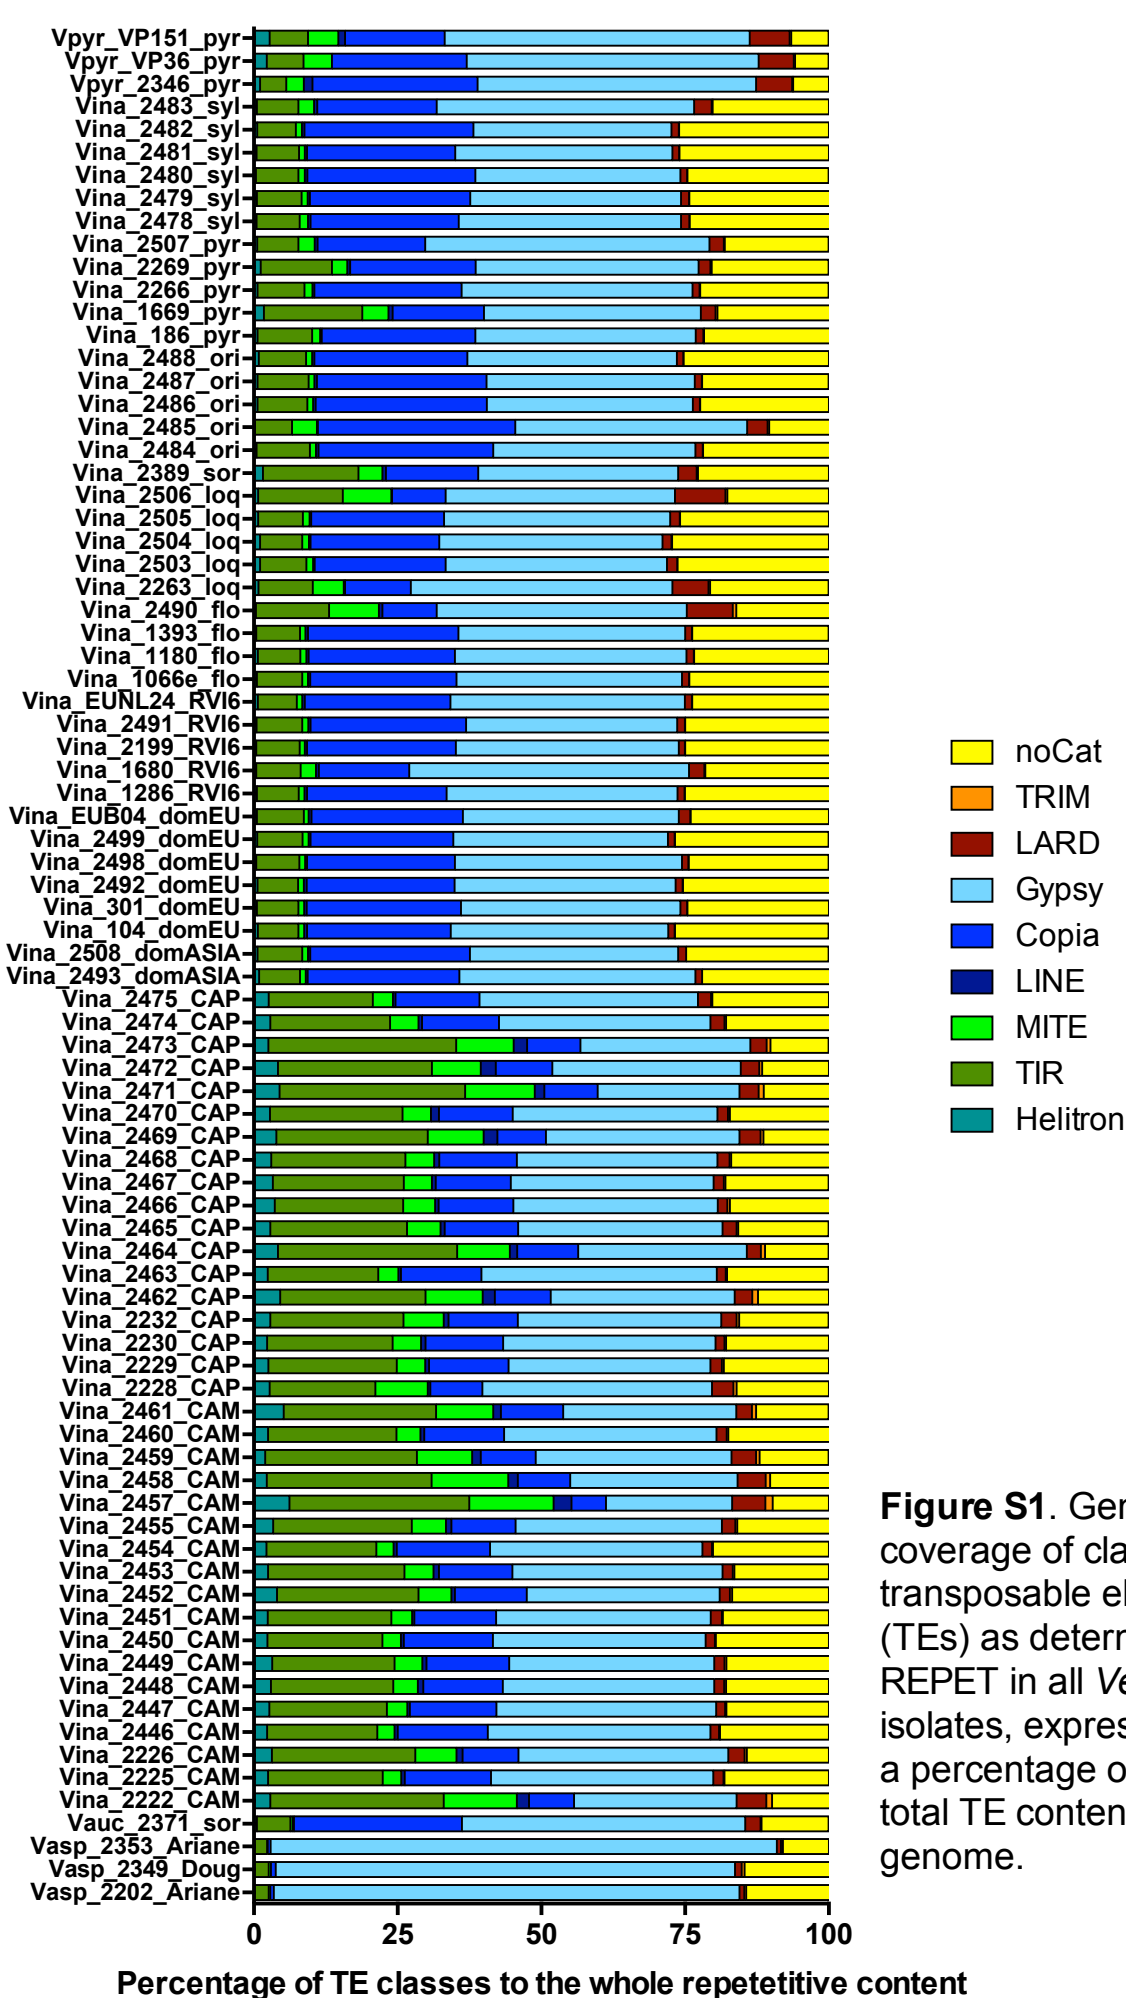

**Figure S1.** Genome coverage of classes of transposable elements (TEs) as determined by REPET in all *Venturia* isolates, expressed as a percentage of the total TE content in each genome.
